# Supplementary material
Source: publisher site journal article supplement (https://www.spandidos-publications.com/7240/downloadSupplementary)
Supplement: Supplementary file 1 [file downloadSupplementary]

**Table SI.** List of antibodies.

| <b>Antibody</b>                             | <b>Clonality</b>    | <b>Conjugation</b> | <b>Dilution</b> | <b>Supplier</b>                | <b>Cat. no.</b> |
|---------------------------------------------|---------------------|--------------------|-----------------|--------------------------------|-----------------|
| Mouse anti- $\alpha$ -globin chain          | monoclonal antibody | Unconjugated       | 1: 500          | Santa Cruz Biotechnology, Inc. | sc-514378       |
| Mouse anti-eNOS/NOS Type III                | monoclonal antibody | Unconjugated       | 1: 1,000        | BD Biosciences                 | 610297          |
| Mouse anti-eNOS (pS1177)                    | monoclonal antibody | Unconjugated       | 1: 2,000        | BD Biosciences                 | 612392          |
| Mouse anti-eNOS (pT495)                     | monoclonal antibody | Unconjugated       | 1: 2,000        | BD Biosciences                 | 612707          |
| Goat anti-mouse IgG                         | polyclonal antibody | HRP                | 1: 5,000        | BD Biosciences                 | 554002          |
| Mouse anti- $\beta$ -actin antibody (AC-15) | monoclonal antibody | HRP                | 1: 50,000       | Abcam                          | ab49900         |
